# Supplementary material for: Critical factors driving spatiotemporal variability in the phytoplankton community structure of the coral habitat in Dongshan Bay, China
Source: Front Microbiol. 2024 Feb 16;15:1355028. doi: 10.3389/fmicb.2024.1355028 (PMC10904553; doi:10.3389/fmicb.2024.1355028)
Supplement: Supplementary file 1 [file Table_1.xlsx]

## Sheet: Supplementary Table 1. List of 
Supplementary Table 1. List of phytoplankton in Dongshan Bay
Phylum/Species	June	August	December
Bacillariophyta
Actinocyclus ehrenbergii	+	+	+
Actinoptychus undulatus	+	+	+
Amphiprora alata		+	+
Asterionella japonica	+	+
Asteromphalus cleveanus		+	+
Bacillaria paradoxa	+	+	+
Bacteriastrum varians	+
Biddulphia aurita	+
Biddulphia mobiliensis	+	+	+
Biddulphia regia	+		+
Biddulphia sinensis			+
Chaetoceros affinis	+		+
Chaetoceros brevis	+
Chaetoceros castracanei	+
Chaetoceros comperssus	+
Chaetoceros constrictus	+
Chaetoceros crinitus	+
Chaetoceros curvisetus	+		+
Chaetoceros debilis	+		+
Chaetoceros decipiens	+		+
Chaetoceros socialis	+
Chaetoceros teres	+		+
Cocconeis scutellum		+
Coscinodiscus asteromphalus	+	+	+
Coscinodiscus bipartitus	+		+
Coscinodiscus curvatulus	+		+
Coscinodiscus deformatus	+
Coscinodiscus granii	+
Coscinodiscus jonesianus		+	+
Coscinodiscus oculatus	+	+	+
Coscinodiscus oculus-iridis			+
Coscinodiscus subconcavus	+	+	+
Coscinodiscus tenuithecus	+		+
Coscinosira polychorda	+	+
Cyclotella striata	+	+	+
Cymatodiscus planetophorus			+
Diploneis bombus	+	+	+
Ditylum brightwellii	+		+
Donkinia sp.	+	+	+
Eucampia cornuta		+
Eucampia zodiacus	+
Grammatophora marina		+
Guinardia flaccida	+		+
Gyrosigma tenuissimum	+
Hemiaulus hauckii	+
Hemiaulus sinensis	+
Lauderia annulata	+	+	+
Leptocylindrus danicus	+	+	+
Leptocylindrus minimus	+	+	+
Licmophora abbreviata	+	+	+
Licmophora californica		+	+
Melosira granulata	+
Melosira juergensi			+
Melosira moniliformis	+
Melosira sulcata	+	+	+
Navicula directa		+	+
Navicula membranacea			+
Navicula sp.			+
Nitzschia closterium	+	+	+
Nitzschia constricta		+
Nitzschia fasciculata		+	+
Nitzschia frustulum	+	+	+
Nitzschia lanceolata	+	+	+
Nitzschia longissima	+	+	+
Nitzschia lorenziana	+	+
Nitzschia panduriformis		+	+
Nitzschia sigma	+	+	+
Nitzschia sp.			+
Pinnularia borealis	+	+	+
Pleurosigma aestuarii	+	+	+
Pleurosigma delicatulum	+	+	+
Pleurosigma falx		+	+
Pleurosigma normanii	+	+	+
Pleurosigma pelagicum		+	+
Pseudo-nitzschia delicatissima	+	+	+
Pseudo-nitzschia multiseries	+
Pseudo-nitzschia pungens	+	+	+
Rhaphoneis amphiceros	+		+
Rhizosolenia calcar-avis	+
Rhizosolenia delicatula	+		+
Rhizosolenia fragilissima	+	+
Rhizosolenia imbricata	+
Rhizosolenia setigera	+	+
Rhizosolenia sinensis	+	+	+
Rhizosolenia stolterforthii	+	+
Rhizosolenia styliformis	+	+
Schröederella delicatula	+
Skeletonema costatum	+	+	+
Skeletonema marinoi	+
Skeletonema tropicum	+
Stephanopyxis palmeriana	+
Surirella fluminensis	+	+	+
Thalassionema nitzschioides	+	+	+
Thalassiosira diporocyclus	+	+	+
Thalassiosira eccentrica	+	+	+
Thalassiosira nordenskiöldii		+
Thalassiosira pacifica	+	+	+
Thalassiosira rotula		+	+
Thalassiosira sp.	+		+
Thalassiosira subtilis	+		+
Triceratium favus			+
Chlorophyta
Actinastrum sp.	+
Pediastrum duplex	+
Scenedesmus acuminatus	+
Scenedesmus dimorphus	+
Scenedesmus quadricauda	+
Chrysophyta
Dictyocha fibula			+
Distephanus octonarius	+
Ebria tripartita		+
Cyanophyta
Merismopedia punctata	+
Spirulina sp.	+
Euglenophyta
Euglena marina	+	+
Prymnesiophyta
Phaeocystis globosa			+
Pyrrophyta
Akashiwo sanguinea	+	+	+
Alexandrium catenella	+
Alexandrium tamarense	+	+
Ceratium furca		+
Ceratium fusus		+
Dinophysis hastata			+
Gambierdiscus toxicus	+
Gymnodinium catenatum		+
Gymnodinium sp.		+
Gymnodinium pulchellum	+		+
Gyrodinium spirale	+	+	+
Karenia mikimotoi	+
Noctiluca scintillans	+
Prorocentrum micans	+	+
Prorocentrum minimum	+		+
Prorocentrum triestinum		+
Protoperidinium bipes	+	+
Protoperidinium conicum	+
Protoperidinium depressum	+
Protoperidinium pentagonum		+
Pyrophacus steinii	+
Scrippsiella trochoidea	+	+	+
